# Supplementary material for: Development of Korean Frailty Index for Primary Care (KFI-PC) and Its Criterion Validity
Source: PubMed Central journal article supplement — Ann Geriatr Med Res. 2020 Jun 22;24(2):125–38. doi: 10.4235/agmr.20.0021 (PMC7370789; doi:10.4235/agmr.20.0021), 2020-06-22
Supplement: agmr-20-0021-suppl1.pdf [file agmr-20-0021-suppl1.pdf]

**Supplementary Table 1. KFI-PC in Korean version**

| No.  | Deficit                                    | 점수                                                                         |
|------|--------------------------------------------|----------------------------------------------------------------------------|
| 1    | 시계 그리기                                     | 비정상 = 1<br>정상 = 0                                                          |
| 2    | 3단어 회상 기억                                  | 0개 = 1<br>1-2개 기억 = 0.5<br>3개 모두 기억 = 0                                    |
| 3    | 인식                                         | 두개 틀림 = 1<br>하나 맞음 = 0.5<br>둘다 맞음 = 0                                      |
| 4    | 우울감                                        | 예 = 1<br>아니오 = 0                                                           |
| 5    | 피로                                         | ≥ 3일 = 1<br>0 - 2일 = 0                                                     |
| 6    | 망상이나 환각 유무 여부                              | 예 = 1<br>아니오 = 0                                                           |
| 7    | 시각 또는 청각 문제                                | 예 = 1<br>아니오 = 0                                                           |
| 8    | 수면 패턴<br>(수면 전 1시간이상 또는 야간 총 수면 시간 8시간 초과) | 둘 중 하나라도 해당 = 1<br>아니오 = 0                                                 |
| 9    | 낮잠                                         | 예 = 1<br>아니오 = 0                                                           |
| 10   | 신체 활동량 감소                                  | 예 = 1<br>아니오 = 0                                                           |
| 11   | 5회 의자에서 일어나기 (시간)                          | ≥ 12초 = 1<br>10 - 12초 = 0.5<br>< 10초 = 0                                   |
| 12-1 | 악력                                         | 예 = 0.5<br>아니오 = 0                                                         |
| 12-2 | 계단 오르기                                     | 예 = 0.5<br>아니오 = 0                                                         |
| 13   | 균형 평가 (ABC scale 총점)                       | ≤ 58.13점 = 1<br>> 58.13점 = 0                                               |
| 14   | 지난 1년간 낙상 여부                               | ≥ 2회 = 1<br>1회 = 0.5<br>없음 = 0                                             |
| 15   | 보행 보조                                      | 매우 어렵다/보조기 (지팡이 등)을 사용해야<br>가능/ 할 수 없다 = 1<br>좀 어렵다 = 0.5<br>전혀 어렵지 않다 = 0 |
| 16   | 도움이나 보조기 없이 운동장 한 바퀴(400m) 정도<br>걷기        | 약간 어렵다/매우 어렵다/전혀 할 수 없다 = 1<br>전혀 어렵지 않다 = 0                               |

|    |                 |                                                          |
|----|-----------------|----------------------------------------------------------|
| 17 | 의자에서 일어서기       | 매우 어렵다/도움 없이는 할 수 없다 = 1<br>좀 어렵다 = 0.5<br>전혀 어렵지 않다 = 0 |
| 18 | 이동 보조 기구        | 휠체어 = 1<br>지팡이 또는 보행기 = 0.5<br>사용 안 함 = 0                |
| 18 | 대변 조절 장애        | 예 = 1<br>아니오 = 0                                         |
| 20 | 소변 조절 장애        | 예 = 1<br>아니오 = 0                                         |
| 21 | 물건 사기 (쇼핑)      | 불가능 / 전적으로 다른 사람 의존 = 1<br>부분적 도움 필요 = 0.5<br>혼자 가능 = 0  |
| 22 | 약 챙겨먹기          | 불가능 / 전적으로 다른 사람 의존 = 1<br>부분적 도움 필요 = 0.5<br>혼자 가능 = 0  |
| 23 | 운전 및 교통 수단 사용   | 불가능 / 전적으로 다른 사람 의존 = 1<br>부분적 도움 필요 = 0.5<br>혼자 가능 = 0  |
| 24 | 금전 관리           | 불가능 / 전적으로 다른 사람 의존 = 1<br>부분적 도움 필요 = 0.5<br>혼자 가능 = 0  |
| 25 | 다중 약물 복용        | ≥ 8개 = 1<br>5 - 7개 = 0.5<br>≤ 4개 = 0                     |
| 26 | 고혈압             | 예 = 1<br>아니오 = 0                                         |
| 27 | 당뇨병             | 예 = 1<br>아니오 = 0                                         |
| 28 | 암 (가벼운 피부암은 제외) | 예 = 1<br>아니오 = 0                                         |
| 29 | 만성폐쇄성폐질환        | 예 = 1<br>아니오 = 0                                         |
| 30 | 심근경색            | 예 = 1<br>아니오 = 0                                         |
| 31 | 심부전             | 예 = 1<br>아니오 = 0                                         |
| 32 | 협심증             | 예 = 1<br>아니오 = 0                                         |
| 33 | 천식              | 예 = 1<br>아니오 = 0                                         |
| 34 | 관절염             | 예 = 1<br>아니오 = 0                                         |

|       |                           |                                                             |
|-------|---------------------------|-------------------------------------------------------------|
| 35    | 뇌졸중                       | 예 = 1<br>아니오 = 0                                            |
| 36    | 신장질환                      | 예 = 1<br>아니오 = 0                                            |
| 37    | 척추협착증                     | 예 = 1<br>아니오 = 0                                            |
| 38-43 | 기타 질환 개수                  | 1개 = 1<br>2개 = 2<br>3개 = 3<br>4개 = 4<br>5개 = 5<br>6개 이상 = 6 |
| 44    | 최근 1년간 입원 횟수              | 1회 이상 = 1<br>없다 = 0                                         |
| 45    | 현재 본인의 건강이 어떻다고 생각하십니까?   | 나쁘다 = 1<br>좋다 = 0                                           |
| 46    | 사회적 접촉                    | 거의 없음 = 1<br>매주/매월 있음 = 0                                   |
| 47    | 동거인 유무                    | 없음 = 1<br>배우자 외 동거인 있음 = 0.5<br>배우자 = 0                     |
| 48    | 하루 평균 식사 횟수               | < 1끼 = 1<br>1끼 = 0.33<br>2끼 = 0.66<br>≥ 3끼 = 0              |
| 49    | 식욕                        | 아주 안 좋다 = 1<br>안 좋다 = 0.66<br>보통이다 = 0.33<br>좋다 / 아주 좋다 = 0 |
| 50    | 근거리 외출                    | 불가능 / 전적으로 다른 사람 의존 = 1<br>부분적 도움 필요 = 0.5<br>혼자 가능 = 0     |
| 51    | 일주일 평균 외출 빈도              | 없음 = 1<br>1일 = 0.75<br>2-3일 = 0.5<br>4-6 일 = 0.25<br>매일 = 0 |
| 52    | 최근 1년간 의도치 않은 4.5kg 체중 감소 | 예 = 1<br>아니오 = 0                                            |
| 53    | 저체중                       | BMI < 18.5 = 1<br>BMI ≥ 18.5 = 0                            |
