# Supplementary material for: Development of Korean Frailty Index for Primary Care (KFI-PC) and Its Criterion Validity
Source: PubMed Central journal article supplement — Ann Geriatr Med Res. 2020 Jun 22;24(2):125–38. doi: 10.4235/agmr.20.0021 (PMC7370789; doi:10.4235/agmr.20.0021), 2020-06-22
Supplement: agmr-20-0021-suppl2.pdf [file agmr-20-0021-suppl2.pdf]

## SUPPLEMENTARY MATERIALS

**Table S2.** Median and quartiles (Q1, Q3) of the Korean Frailty Index for Primary Care scores for men and women and for three age groups

|             | Men        |                  | Women      |                  | p-value |
|-------------|------------|------------------|------------|------------------|---------|
|             | n (%)      | Median (Q1–Q3)   | n (%)      | Median (Q1–Q3)   |         |
| Overall     | 586 (100)  | 0.13 (0.09–0.19) | 656 (100)  | 0.19 (0.13–0.25) | 0.000   |
| 70–74 years | 157 (26.8) | 0.11 (0.08–0.17) | 211 (32.2) | 0.17 (0.12–0.22) | 0.000   |
| 75–79 years | 234 (39.9) | 0.13 (0.08–0.18) | 260 (39.9) | 0.19 (0.17–0.25) | 0.000   |
| ≥80 years   | 195 (33.3) | 0.14 (0.11–0.20) | 185 (28.2) | 0.24 (0.17–0.29) | 0.000   |

Q1, first quartile; Q3, third quartile.

p-values calculated with Mann–Whitney U tests.

Non-parametric post-hoc testing using Mann–Whitney U tests (two-tailed,  $p < 0.016$ ); Men: 70–74 vs. 75–79 years ( $p = 0.144$ ), 70–74 vs. ≥80 years ( $p = 0.000$ ), 75–79 vs. ≥80 years ( $p = 0.004$ ); Women: 70–74 vs. 75–79 years ( $p = 0.001$ ), 70–74 vs. ≥80 years ( $p = 0.000$ ), and 75–79 vs. ≥80 years ( $p = 0.004$ ).
